# Supplementary material
Source: PubMed Central journal article supplement (PMC8923617)
Supplement: NIHMS1778954-supplement-1.pdf [file NIHMS1778954-supplement-1.pdf]

**Table S1:** Results for the modified Turek-Hron benchmark with different IB and B-spline kernels and various values of  $M_{\text{FAC}}$  at a Cartesian resolution of  $N = 64$ .

| Kernel             | $M_{\text{FAC}} = 0.5$ |        | $M_{\text{FAC}} = 1.0$ |        | $M_{\text{FAC}} = 2.0$ |        | $M_{\text{FAC}} = 4.0$ |        |
|--------------------|------------------------|--------|------------------------|--------|------------------------|--------|------------------------|--------|
|                    | $A_x (\times 10^{-3})$ | $St_x$ |
| IB (3-point)       | $-2.03 \pm 1.97$       | 10.4   | $-2.69 \pm 2.54$       | 10.4   | $-2.76 \pm 2.65$       | 10.8   | $-3.02 \pm 2.87$       | 10.8   |
| IB (4-point)       | $-1.55 \pm 1.56$       | 10.4   | $-2.51 \pm 2.39$       | 10.4   | $-2.69 \pm 2.58$       | 10.8   | $-2.94 \pm 2.80$       | 10.8   |
| IB (5-point)       | $-2.51 \pm 2.38$       | 10.4   | $-2.57 \pm 2.44$       | 10.4   | $-2.70 \pm 2.60$       | 10.8   | $-2.95 \pm 2.81$       | 10.8   |
| IB (6-point)       | $-2.46 \pm 2.35$       | 10.4   | $-2.48 \pm 2.36$       | 10.4   | $-2.65 \pm 2.53$       | 10.4   | $-2.89 \pm 2.75$       | 10.8   |
| B-spline (3-point) | $-2.57 \pm 2.44$       | 10.8   | $-2.69 \pm 2.55$       | 10.8   | $-2.76 \pm 2.66$       | 10.8   | $-3.03 \pm 2.89$       | 10.8   |
| B-spline (4-point) | $-2.53 \pm 2.42$       | 10.4   | $-2.67 \pm 2.54$       | 10.4   | $-2.74 \pm 2.63$       | 10.8   | $-3.00 \pm 2.86$       | 10.8   |
| B-spline (5-point) | $-2.55 \pm 2.43$       | 10.4   | $-2.63 \pm 2.50$       | 10.8   | $-2.72 \pm 2.62$       | 10.8   | $-2.98 \pm 2.84$       | 10.8   |
| B-spline (6-point) | $-2.54 \pm 2.42$       | 10.4   | $-2.58 \pm 2.46$       | 10.4   | $-2.70 \pm 2.60$       | 10.8   | $-2.96 \pm 2.82$       | 10.8   |
| Kernel             | $A_y (\times 10^{-3})$ | $St_y$ |
| IB (3-point)       | $1.37 \pm 29.2$        | 5.00   | $1.45 \pm 33.3$        | 5.00   | $1.42 \pm 34.1$        | 5.00   | $1.48 \pm 35.2$        | 5.00   |
| IB (4-point)       | $1.04 \pm 25.9$        | 5.00   | $1.46 \pm 32.2$        | 5.00   | $1.41 \pm 33.5$        | 5.00   | $1.47 \pm 34.6$        | 5.00   |
| IB (5-point)       | $1.39 \pm 32.2$        | 5.00   | $1.48 \pm 32.6$        | 5.00   | $1.41 \pm 33.6$        | 5.00   | $1.48 \pm 34.7$        | 5.00   |
| IB (6-point)       | $1.39 \pm 31.9$        | 5.00   | $1.44 \pm 32.0$        | 5.00   | $1.41 \pm 33.2$        | 5.00   | $1.47 \pm 34.3$        | 5.00   |
| B-spline (3-point) | $1.41 \pm 32.7$        | 5.00   | $1.44 \pm 33.4$        | 5.00   | $1.41 \pm 34.2$        | 5.00   | $1.49 \pm 35.3$        | 5.00   |
| B-spline (4-point) | $1.41 \pm 32.5$        | 5.00   | $1.46 \pm 33.3$        | 5.00   | $1.42 \pm 34.0$        | 5.00   | $1.48 \pm 35.1$        | 5.00   |
| B-spline (5-point) | $1.39 \pm 32.5$        | 5.00   | $1.48 \pm 33.0$        | 5.00   | $1.42 \pm 33.8$        | 5.00   | $1.48 \pm 34.9$        | 5.00   |
| B-spline (6-point) | $1.41 \pm 32.4$        | 5.00   | $1.48 \pm 32.6$        | 5.00   | $1.41 \pm 33.7$        | 5.00   | $1.48 \pm 34.8$        | 5.00   |

## Appendix

### A Turek-Hron Benchmark Results for Various Choices of Kernel Function

This section details results for the modified Turek-Hron benchmark using various IB and B-spline kernels (see Figures S1 and S2). Table S1 reports the means for  $A_x$  and  $A_y$ , which are  $x$ -,  $y$ -displacements of the point  $A$ , as well as the Strouhal numbers corresponding to the oscillations of  $A_x$  and  $A_y$  at periodic steady-state. Here we look at relatively coarser resolution cases, in which the number of grid cells on coarsest grid level is  $N = 64$ . These results indicate that the three-point B-spline kernel is the only kernel that shows consistent Strouhal numbers for all values of  $M_{\text{FAC}} = 0.5, 1, 2, \text{ and } 4$  at  $N = 64$ , and that it is less sensitive to changes in  $M_{\text{FAC}}$ . Other kernels show loss of accuracy as we refine the Lagrangian mesh for a fixed Eulerian grid that is relatively coarse.

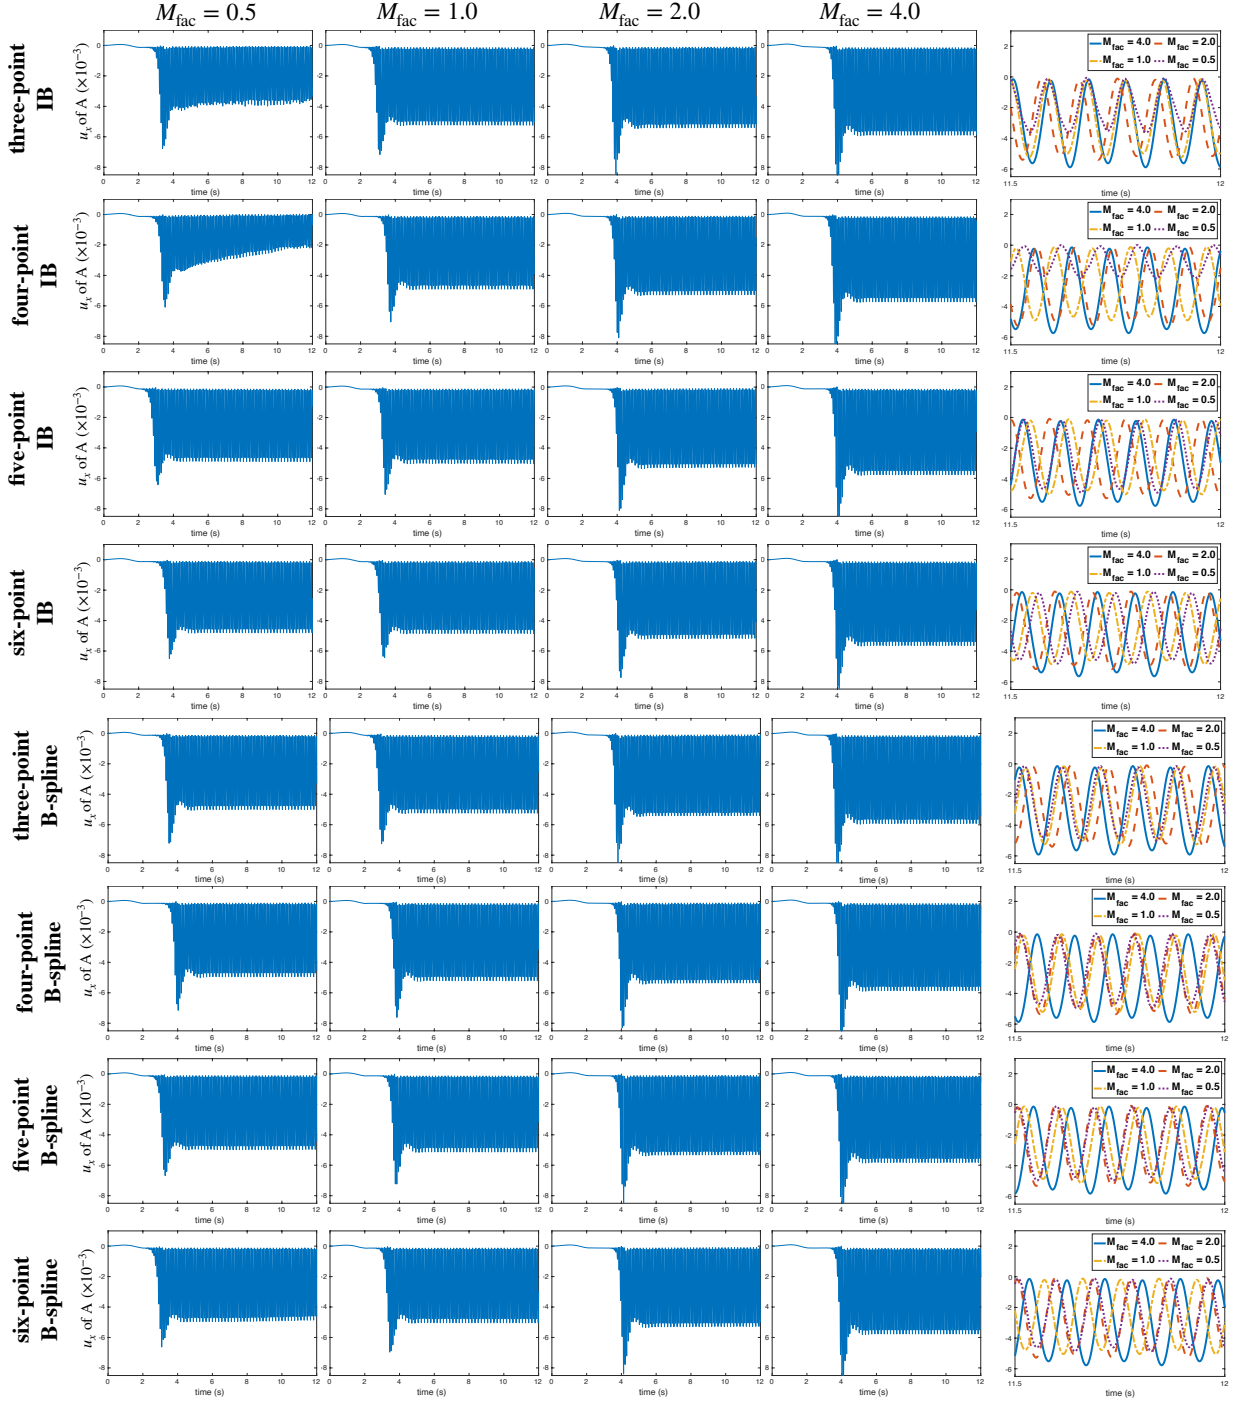

**Figure S1:**  $x$ -displacement ( $A_x$ ) of the point  $A$  for different values of  $M_{\text{FAC}}$  for the modified Turek-Hron benchmark using different IB and B-spline kernels at a Cartesian resolution of  $N = 64$ . Figures in the rightmost panels show the periodic oscillations between  $t = 11.5$  and  $t = 12$ .

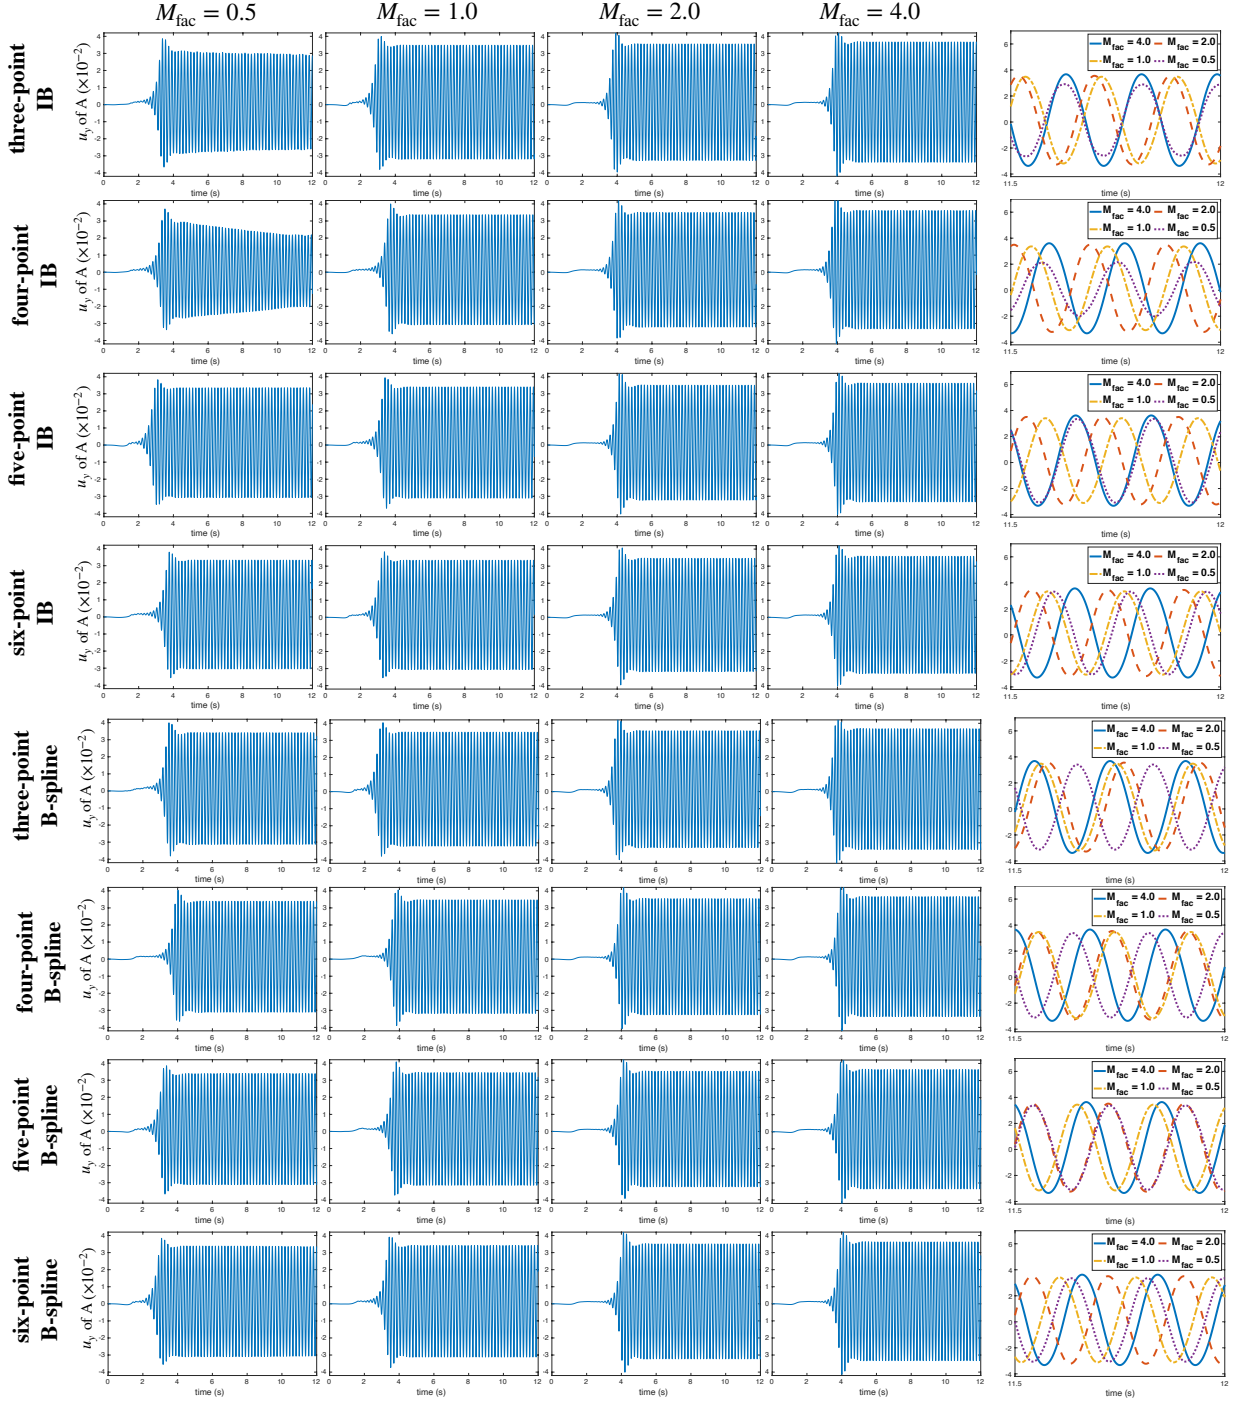

**Figure S2:**  $y$ -displacement ( $A_y$ ) of the point  $A$  for different values of  $M_{\text{FAC}}$  for the modified Turek-Hron benchmark using different IB and B-spline kernels at a Cartesian resolution of  $N = 64$ . Figures in the rightmost panels show the periodic oscillations between  $t = 11.5$  and  $t = 12$ .
